# Supplementary material
Source: publisher figshare collection journal article supplement (https://tandf.figshare.com/articles/dataset/_/9744860)

**Scatter Plot (Inter-Rater)**

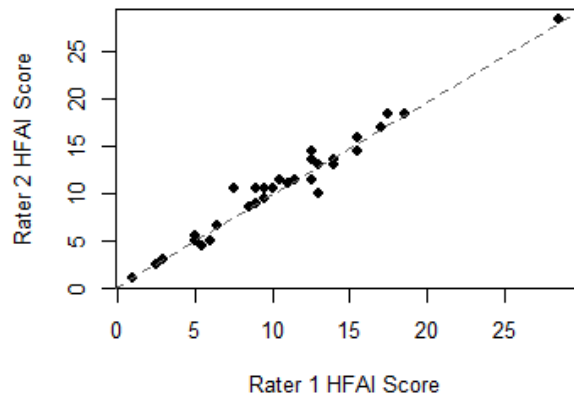

**Bland-Altman Plot (Inter-Rater)**

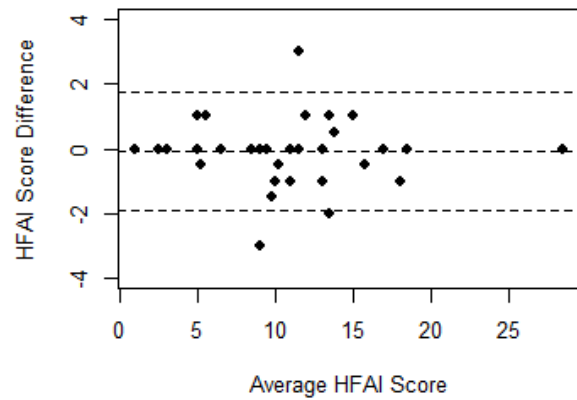

**Scatter Plot (Test-Retest)**

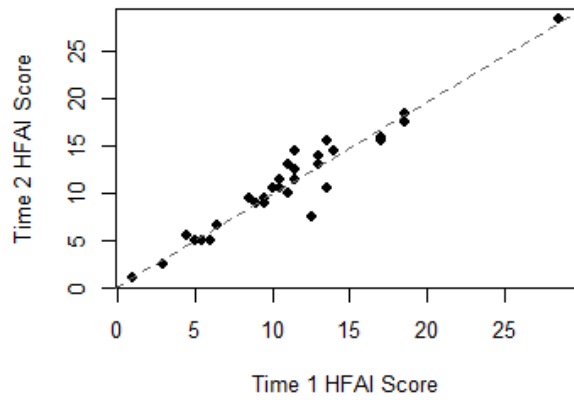

**Bland-Altman Plot (Test-Retest)**

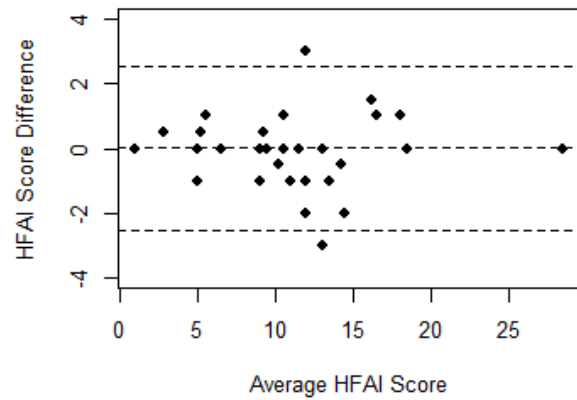

Supplement: Supplementary file 1 [file 1]
