# Supplementary material
Source: publisher figshare collection journal article supplement (https://tandf.figshare.com/articles/dataset/_/9744860)
Supplement: Supplementary file 3 [file 1]

|                                                                                                                                                                                                                                                                                                                                                                                                                                    |                                        |                                                                     |                                                                      |                    |                                                                               |                                                                             |                                                                                                              |
|------------------------------------------------------------------------------------------------------------------------------------------------------------------------------------------------------------------------------------------------------------------------------------------------------------------------------------------------------------------------------------------------------------------------------------|----------------------------------------|---------------------------------------------------------------------|----------------------------------------------------------------------|--------------------|-------------------------------------------------------------------------------|-----------------------------------------------------------------------------|--------------------------------------------------------------------------------------------------------------|
| Store ID: _____                                                                                                                                                                                                                                                                                                                                                                                                                    | <b>Baltimore Food Store Study 2016</b> |                                                                     |                                                                      |                    | Data Collector: _____                                                         |                                                                             |                                                                                                              |
| <b>Healthy Food Availability Index and Whole Staple Food Assessment</b>                                                                                                                                                                                                                                                                                                                                                            |                                        |                                                                     |                                                                      |                    |                                                                               |                                                                             |                                                                                                              |
| <input type="checkbox"/> Public Market<br><input type="checkbox"/> Supermarket<br><input type="checkbox"/> Small Grocery<br><input type="checkbox"/> Specialty Store<br><input type="checkbox"/> Discount Store<br><input type="checkbox"/> Corner Store<br><input type="checkbox"/> Pharmacy<br><input type="checkbox"/> Convenience Store<br><input type="checkbox"/> Gas Station<br><input type="checkbox"/> Behind Glass Store | Store Name: _____                      |                                                                     |                                                                      |                    | Grid: _____                                                                   | Date: _____                                                                 |                                                                                                              |
|                                                                                                                                                                                                                                                                                                                                                                                                                                    | Store Address: _____                   |                                                                     |                                                                      |                    | Prepared Food:<br><input type="checkbox"/> Yes<br><input type="checkbox"/> No | Parking Lot:<br><input type="checkbox"/> Yes<br><input type="checkbox"/> No |                                                                                                              |
|                                                                                                                                                                                                                                                                                                                                                                                                                                    | <input type="checkbox"/> New           | WIC:<br><input type="checkbox"/> Yes<br><input type="checkbox"/> No | SNAP:<br><input type="checkbox"/> Yes<br><input type="checkbox"/> No | # Registers: _____ | # Aisles: _____                                                               | Fridge<br>Fridge - Staple<br>Freezer<br>Freezer - Staple                    | <input type="checkbox"/><br><input type="checkbox"/><br><input type="checkbox"/><br><input type="checkbox"/> |
|                                                                                                                                                                                                                                                                                                                                                                                                                                    | <input type="checkbox"/> Perm. closed  | Comments: _____                                                     |                                                                      |                    |                                                                               |                                                                             |                                                                                                              |
|                                                                                                                                                                                                                                                                                                                                                                                                                                    | <input type="checkbox"/> Refusal       |                                                                     |                                                                      |                    |                                                                               |                                                                             |                                                                                                              |
| <input type="checkbox"/> Unable                                                                                                                                                                                                                                                                                                                                                                                                    |                                        |                                                                     |                                                                      |                    |                                                                               |                                                                             |                                                                                                              |
| <input type="checkbox"/> Not open (2x)                                                                                                                                                                                                                                                                                                                                                                                             |                                        |                                                                     |                                                                      |                    |                                                                               |                                                                             |                                                                                                              |

| FRESH FRUIT & VEG                                                                     | CANNED FRUIT & VEG                                                             | DRIED/CANNED OTHER                                                                                                           |
|---------------------------------------------------------------------------------------|--------------------------------------------------------------------------------|------------------------------------------------------------------------------------------------------------------------------|
| Type(s) of Fresh Fruit: <u>1-5</u> (#)                                                | Type(s) of Canned Fruit: <u>.5</u> (#)                                         | Dried Beans <u>[.5] Yes</u><br>Available: <input type="checkbox"/> No                                                        |
| Quality of Fresh Fruit: <input type="checkbox"/> A <input type="checkbox"/> UA        | Type(s) of Canned Veg: <u>.5</u> (#)                                           | Canned Beans <input type="checkbox"/> Yes <input type="checkbox"/> No                                                        |
| Type(s) of Fresh Veg: <u>1-5</u> (#)                                                  | FROZEN FOODS                                                                   | Available:                                                                                                                   |
| Quality of Fresh Veg: <input type="checkbox"/> A <input type="checkbox"/> UA          | Type(s) of Frozen Fruit: <u>1</u> (#)                                          | Soup(s) <input type="checkbox"/> Yes<br>Available: <input type="checkbox"/> No                                               |
| Comments:                                                                             | Type(s) of Frozen Veg: <u>1</u> (#)                                            | Low-Sodium Soup(s) <u>[1] Yes</u><br><input type="checkbox"/> No                                                             |
|                                                                                       | Meal(s) <input type="checkbox"/> Yes<br>Available: <input type="checkbox"/> No | Available:                                                                                                                   |
| JUICE                                                                                 | Healthier <u>[1] Yes</u>                                                       | Nuts/Seeds <input type="checkbox"/> Yes<br>Available: <input type="checkbox"/> No                                            |
| 100% Fruit Juice <u>[1] Yes</u><br>Available: <input type="checkbox"/> No             | Meal(s) <input type="checkbox"/> No<br>Available:                              | Nut Butter <input type="checkbox"/> Yes<br>Available: <input type="checkbox"/> No                                            |
| 100% Veg Juice <input type="checkbox"/> Yes <input type="checkbox"/> No<br>Available: | Comments:                                                                      | Canned Protein <input type="checkbox"/> Meat <input type="checkbox"/> Poultry<br>Available: <input type="checkbox"/> Seafood |

| MEAT                                                                                   | CHICKEN                                                                                    | SEAFOOD                                                                                |
|----------------------------------------------------------------------------------------|--------------------------------------------------------------------------------------------|----------------------------------------------------------------------------------------|
| Ground Beef <u>[1] Yes</u><br>Available: <input type="checkbox"/> No                   | Chicken breast <u>[1] Yes</u><br>Available: <input type="checkbox"/> No                    | Finned Fish <u>[1] Yes</u><br>Available: <input type="checkbox"/> No                   |
| Quality of Ground Beef: <input type="checkbox"/> A <input type="checkbox"/> UA         | Quality Of Chicken: <input type="checkbox"/> A <input type="checkbox"/> UA                 | Quality Of Fish: <input type="checkbox"/> A <input type="checkbox"/> UA                |
| % Lean: <u>1</u> (if 85%+) % Fat: _____                                                | Other Chicken: <input type="checkbox"/> Yes <input type="checkbox"/> No                    | Shell Fish <input type="checkbox"/> Yes<br>Available: <input type="checkbox"/> No      |
| Other Beef <input type="checkbox"/> Yes<br>Available: <input type="checkbox"/> No      | Other Poultry: <input type="checkbox"/> Yes <input type="checkbox"/> No                    | Option(s) <input type="checkbox"/> Fresh<br>Available: <input type="checkbox"/> Frozen |
| Pork <input type="checkbox"/> Yes<br>Available: <input type="checkbox"/> No            | Option(s) <input type="checkbox"/> Fresh<br>Available: <input type="checkbox"/> Frozen     | Comments:                                                                              |
| Deli Meat <input type="checkbox"/> Yes<br>Available: <input type="checkbox"/> No       | OTHER PROTEIN                                                                              |                                                                                        |
| Other Meat <input type="checkbox"/> Yes<br>Available: <input type="checkbox"/> No      | Eggs <input type="checkbox"/> Yes<br>Available: <input type="checkbox"/> No                |                                                                                        |
| Option(s) <input type="checkbox"/> Fresh<br>Available: <input type="checkbox"/> Frozen | Meat <input type="checkbox"/> Yes<br>Alternative <input type="checkbox"/> No<br>Available: |                                                                                        |

| DAIRY            |                                         | GRAINS/CEREALS  |                                         |
|------------------|-----------------------------------------|-----------------|-----------------------------------------|
| Milk             | <input checked="" type="checkbox"/> Yes | Loaf Bread      | <input type="checkbox"/> Yes            |
| Available:       | <input type="checkbox"/> No             | Available:      | <input type="checkbox"/> No             |
| Low Fat Milk     | <input checked="" type="checkbox"/> Yes | 100% WW         | <input type="checkbox"/> Yes            |
|                  | <input type="checkbox"/> No             | Available:      | <input type="checkbox"/> No             |
| Available:       |                                         | Tortillas       | <input type="checkbox"/> Yes            |
| Butter           | <input type="checkbox"/> Yes            | Available       | <input type="checkbox"/> No             |
| Available:       | <input type="checkbox"/> No             | Corn Tortillas  | <input type="checkbox"/> Yes            |
| Margarine        | <input type="checkbox"/> Yes            | Available:      | <input type="checkbox"/> No             |
| Available:       | <input type="checkbox"/> No             | Pasta           | <input checked="" type="checkbox"/> Yes |
| Hard Cheese      | <input type="checkbox"/> Yes            | Available       | <input type="checkbox"/> No             |
| Available:       | <input type="checkbox"/> No             | Rice            | <input checked="" type="checkbox"/> Yes |
| Soft Cheese      | <input type="checkbox"/> Yes            | Available:      | <input type="checkbox"/> No             |
| Available:       | <input type="checkbox"/> No             | Bagel           | <input type="checkbox"/> Yes            |
| Vegan Cheese     | <input type="checkbox"/> Yes            | Available:      | <input type="checkbox"/> No             |
| Available:       | <input type="checkbox"/> No             | Pita            | <input type="checkbox"/> Yes            |
| Other Milk       | <input type="checkbox"/> Yes            | Available:      | <input type="checkbox"/> No             |
| Available:       | <input type="checkbox"/> No             | Roll/Bun/Bisc.  | <input type="checkbox"/> Yes            |
| Plant Milk       | <input type="checkbox"/> Yes            | Available:      | <input type="checkbox"/> No             |
| Available        | <input type="checkbox"/> No             | Pie/Crust       | <input type="checkbox"/> Yes            |
| Yogurt/Sour      | <input type="checkbox"/> Yes            | Available:      | <input type="checkbox"/> No             |
| Available:       | <input type="checkbox"/> No             | Waffle/Pancake  | <input type="checkbox"/> Yes            |
| Infant formula   | <input type="checkbox"/> Yes            | Available:      | <input type="checkbox"/> No             |
| Available:       | <input type="checkbox"/> No             | Corn Meal/Grits | <input type="checkbox"/> Yes            |
| Option(s)        | <input type="checkbox"/> Fresh          | Available:      | <input type="checkbox"/> No             |
| Available:       | <input type="checkbox"/> Shelf-Stable   | Flour/Baking    | <input type="checkbox"/> Yes            |
|                  |                                         | Available:      | <input type="checkbox"/> No             |
| Dairy Varieties: | _____ (#)                               | Corn Meal/Grits | <input type="checkbox"/> Yes            |
|                  |                                         | Available:      | <input type="checkbox"/> No             |
